# Supplementary material for: Comprehensive Analysis of lncRNA–mRNA Expression Profiles in Depression-like Responses of Mice Related to Polystyrene Nanoparticle Exposure
Source: MDPI journal article supplement (doi:10.3390/toxics11070600), 2023-07-10
Supplement: s1 [file s1]

## Supplementary Materials

**Table S1.** The detailed information of the top five up-regulated and down-regulated lncRNAs.

| Transcript ID  | length | log <sub>2</sub> FC | regulation | P-value     | FDR         | chromosome |
|----------------|--------|---------------------|------------|-------------|-------------|------------|
| MSTRG.11938.2  | 30597  | 15.85               | up         | 3.44E-07    | 0.000148291 | chr14      |
| MSTRG.1811.2   | 7160   | 15.81               | up         | 1.75E-06    | 0.000577    | chr1       |
| MSTRG.36128.2  | 2939   | 15.75               | up         | 1.50E-10    | 2.94577E-07 | chr7       |
| MSTRG.31084.1  | 244    | 15.53               | up         | 0.000299043 | 0.022645844 | chr5       |
| MSTRG.1615.1   | 2805   | 15.07               | up         | 1.15E-05    | 0.002319591 | chr1       |
| MSTRG.15298.1  | 380    | -14.92              | down       | 0.00029965  | 0.022663565 | chr16      |
| MSTRG.33589.2  | 11203  | -15.12              | down       | 5.06E-06    | 0.001290824 | chr6       |
| MSTRG.43000.11 | 2397   | -15.16              | down       | 1.03E-08    | 7.55815E-06 | chrX       |
| MSTRG.15769.2  | 12765  | -15.28              | down       | 1.42E-06    | 0.000489261 | chr16      |
| MSTRG.41808.2  | 824    | -15.47              | down       | 4.41E-05    | 0.004723303 | chr9       |

**Table S2.** The detailed information of primer sequences

| Primer names     | sequences(5'to3')                                      |
|------------------|--------------------------------------------------------|
| MSTRG.11938.2-F  | GCTCAAGGCAGAACAGGCTATGG                                |
| MSTRG.11938.2-R  | TTGTTGGTTGCTTGCTTGCTTTGG                               |
| MSTRG.1811.2-F   | ACAGACAACAGCAAGCAGGAAGAC                               |
| MSTRG.1811.2-R   | CAGAGGGGAGAGGGAGTGAAACC                                |
| MSTRG.1615.1-F   | GTCTCTGACCACCCACAAATGC                                 |
| MSTRG.1615.1-R   | TGTCCCTCCATCTGTCCATCCATC                               |
| MSTRG.33589.2-F  | GAGGGTGGGTTCTGAATGTAATGGG                              |
| MSTRG.33589.2-R  | TTGTGCTTGCTGACCTATTGCTACC                              |
| MSTRG.43000.11-F | GCGTTAGAGACAGACCCAGATTTCC                              |
| MSTRG.43000.11-R | CACAGGTCAGAGTGCTCCATTGC                                |
| MSTRG.15769.2-F  | CACTTCTCTGGTCTCTGGCACTTTC                              |
| MSTRG.15769.2-R  | ATGGACTTGGAGAGGGAACAGGAG                               |
| m-miR-383-3p-F   | AACAATCCACAGCACTGCCT                                   |
| m-miR-383-3p-R   | CAGTGCAGGGTCCGAGGT                                     |
| m-miR-383-3p-RT  | GTCGTATCCAGTGCAGGGTCCGAGGTATTCGCA<br>CTGGATACGACTCTGAC |
| m-miR-199b-5p-F  | CGCGCCCAGTGTTTCAGACTAC                                 |
| m-miR-199b-5p-R  | AGTGCAGGGTCCGAGGTATT                                   |
| m-miR-199b-5p-RT | GTCGTATCCAGTGCAGGGTCCGAGGTATTCGCA<br>CTGGATACGACGAACAG |
| m-miR-152-3p-F   | AGGTGTTCTCAGTGCATGACA                                  |
| m-miR-152-3p-R   | CAGTGCAGGGTCCGAGGT                                     |

|                   |                                                         |
|-------------------|---------------------------------------------------------|
| m-miR-152-3p-RT   | GTCGTATCCAGTGCAGGGTCCGAGGTATTTCGCA<br>CTGGATACGACCCAAGT |
| m-miR-667-3p-F    | ATTGCCTGACACCTGCCAC                                     |
| m-miR-667-3p-R    | CAGTGCAGGGTCCGAGGT                                      |
| m-miR-667-3p-RT   | GTCGTATCCAGTGCAGGGTCCGAGGTATTTCGCA<br>CTGGATACGACCTTGGG |
| m-miR-3084-3p-F   | AAGCACTTCTGCCAGTCTCC                                    |
| m-miR-3084-3p-R   | CAGTGCAGGGTCCGAGGT                                      |
| m-miR-3084-3p-RT  | GTCGTATCCAGTGCAGGGTCCGAGGTATTTCGCA<br>CTGGATACGACTGTCTG |
| m-miR-216b-5p-F   | GCGAAATCTCTGCAGGCAA                                     |
| m-miR-216b-5p-R   | AGTGCAGGGTCCGAGGTATT                                    |
| m-miR-216b-5p-RT  | GTCGTATCCAGTGCAGGGTCCGAGGTATTTCGCA<br>CTGGATACGACTCACAT |
| m-ENSMUST024639-F | ACAAGAGAAGGAAGCCCAACACAAG                               |
| m-ENSMUST024639-R | GTGGCGAAGGTGGCAGATTAGC                                  |
| m-ENSMUST027020-F | CACACGGAACACGGCATCTACTG                                 |
| m-ENSMUST027020-R | ATGGGCAGGGTGGTGGGTAATC                                  |
| m-ENSMUST102888-F | CACACCACTTCCTTCCACCACTTC                                |
| m-ENSMUST102888-R | AGCATTCCATACAAGAGCCAAACCC                               |
| m-ENSMUST017548-F | GCTGAGGCTCGCAGGTCTAA                                    |
| m-ENSMUST017548-R | GCCAGGCCGCTATGTACAGA                                    |
| m-ENSMUST120737-F | GATAACCACTTCCGATGAGCCAGAC                               |
| m-ENSMUST120737-R | AGCAGCGAGCACAGCAAAGTAC                                  |
| m-ENSMUST046542-F | GAAGCCGCTGTGTCTGTGTAG                                   |
| m-ENSMUST046542-R | GCTCTTCCCTCTGGCATGTTTG                                  |

**Table S3.** The detailed information of the top five up-regulated and down-regulated mRNAs

| mRNA name          | length | Gene id | log <sub>2</sub> FC | regulation | P-value  | FDR         | chromosome |
|--------------------|--------|---------|---------------------|------------|----------|-------------|------------|
| ENSMUST00000106933 | 5191   | Dnajc6  | 18.58               | up         | 2.59E-07 | 0.000118285 | chr4       |
| ENSMUST00000179365 | 2464   | Snx10   | 17.87               | up         | 4.51E-13 | 3.14738E-09 | chr6       |
| ENSMUST00000033163 | 1823   | Mettl9  | 17.44               | up         | 2.31E-06 | 0.000720954 | chr7       |
| ENSMUST00000069994 | 2258   | St3gal5 | 17.14               | up         | 2.70E-06 | 0.000827866 | chr6       |
| ENSMUST00000031862 | 1889   | Cbx3    | 16.80               | up         | 5.38E-06 | 0.001361614 | chr6       |
| ENSMUST00000098190 | 5008   | Rragd   | -17.22              | down       | 8.51E-07 | 0.000322074 | chr4       |
| ENSMUST00000022816 | 3372   | Sub1    | -17.37              | down       | 4.16E-06 | 0.001134237 | chr15      |
| ENSMUST00000178474 | 2565   | Actr3   | -17.62              | down       | 1.12E-14 | 1.70314E-10 | chr1       |
| ENSMUST00000082424 | 2013   | Selenop | -17.63              | down       | 4.47E-06 | 0.001176372 | chr15      |
| ENSMUST00000152117 | 2572   | Ttc3    | -17.94              | down       | 4.33E-06 | 0.001163543 | chr16      |

**Table S4.** The detailed information of differentially expressed miRNAs

| miRNA name       | miRNA seq                    | Regulation | P-value | Expression level | homology in human     |
|------------------|------------------------------|------------|---------|------------------|-----------------------|
| mmu-let-7f-5p    | TGAGGTAGTAGATTGTATAGT<br>T   | up         | 0.004   | high             | hsa-let-7f-5p: 1-22   |
| mmu-miR-667-3p   | TGACACCTGCCACCCAGCCCA<br>AG  | down       | 0.005   | middle           | No matches            |
| mmu-miR-28a-3p   | CACTAGATTGTGAGCTGCTGG<br>A   | up         | 0.005   | middle           | hsa-miR-28-3p: 1-22   |
| mmu-miR-3084-3p  | TTCTGCCAGTCTCCTTCAGAC<br>A   | down       | 0.008   | middle           | No matches            |
| mmu-miR-152-3p   | TCAGTGCATGACAGAACTTGG        | up         | 0.009   | middle           | hsa-miR-152-3p: 1-21  |
| mmu-miR-3572-3p  | TTACACTTGTCTTCTTTCCCC<br>AGT | down       | 0.013   | middle           | No matches            |
| PC-3p-25230      | TCCAACTTGGCCCTTCCAGT         | down       | 0.020   | low              | No matches            |
| mmu-miR-216b-5p  | AAATCTCTGCAGGCAAATGTG<br>A   | down       | 0.026   | middle           | hsa-miR-216b-5p: 1-22 |
| mmu-miR-369-5p   | AGATCGACCGTGTTATATTCG<br>C   | up         | 0.028   | middle           | hsa-miR-369-5p: 1-22  |
| mmu-miR-551b-3p  | GCGACCCATACTTGGTTTCAG<br>T   | up         | 0.029   | middle           | hsa-miR-551b-3p: 1-21 |
| hsa-mir-1260b-p3 | TCCCACCGCTGCCACCATT          | down       | 0.030   | low              | hsa-mir-1260b-p3      |
| hsa-mir-1260b-p5 | TCCCACCGCTGCCACCATT          | down       | 0.030   | low              | hsa-mir-1260b-p5      |
| mmu-let-7g-5p    | TGAGGTAGTAGTTTGTACAGT<br>T   | up         | 0.030   | high             | hsa-let-7g-5p: 1-22   |
| mmu-miR-133a-5p  | AGCTGGTAAAATGGAACCAA<br>AT   | up         | 0.033   | low              | hsa-miR-133a-5p: 1-22 |
| cpo-miR-16a-5p   | TAGCAGCACGTAAATATTGG<br>A    | up         | 0.034   | middle           | hsa-miR-16-5p: 1-20   |
| mmu-miR-199b-3p  | ACAGTAGTCTGCACATTGGTT        | up         | 0.035   | middle           | hsa-miR-199a-3p: 1-21 |
| mmu-miR-30e-3p   | CTTTCAGTCGGATGTTTACAG<br>C   | up         | 0.036   | middle           | hsa-miR-30e-3p: 1-22  |
| mmu-miR-98-5p    | TGAGGTAGTAAGTTGTATTGT<br>T   | up         | 0.036   | middle           | hsa-miR-98-5p: 1-22   |
| mmu-let-7i-5p    | TGAGGTAGTAGTTTGTGCTGT<br>T   | up         | 0.039   | high             | hsa-let-7i-5p: 1-22   |
| PC-3p-12229      | ACAGTCAAAGCCCCTGCCTCG<br>T   | down       | 0.039   | middle           | No matches            |
| mmu-miR-139-5p   | TCTACAGTGCACGTGTCTCCA<br>GT  | down       | 0.040   | high             | hsa-miR-139-5p: 1-23  |
| mmu-miR-199b-5p  | CCCAGTGTTCAGACTACCTGT<br>TC  | up         | 0.043   | middle           | hsa-miR-199a-5p: 1-23 |

|                 |                              |      |       |        |                           |
|-----------------|------------------------------|------|-------|--------|---------------------------|
| mmu-miR-199a-5p | CCCAGTGTTTCAGACTACCTGT<br>TC | up   | 0.043 | middle | hsa-miR-199a-5p: 1-<br>23 |
| PC-3p-33965     | TCTGCTCTGCTGGGCCGCGCT<br>T   | down | 0.043 | middle | No matches                |
| mmu-miR-222-3p  | AGCTACATCTGGCTACTGGGT<br>CT  | down | 0.045 | high   | hsa-miR-222-3p: 1-<br>21  |
| mmu-miR-383-3p  | CCACAGCACTGCCTGGTCAGA        | up   | 0.046 | middle | hsa-miR-383-3p: 1-<br>19  |
| mmu-miR-540-3p  | AGGTCAGAGGTCGATCCTGG<br>GC   | down | 0.047 | middle | No matches                |
| mmu-miR-708-5p  | AAGGAGCTTACAATCTAGCTG<br>GG  | up   | 0.047 | middle | hsa-miR-708-5p: 1-<br>23  |
| mmu-miR-126a-3p | TCGTACCGTGAGTAATAATGC        | up   | 0.048 | high   | hsa-miR-126-3p: 1-<br>21  |

---
